# Supplementary material for: Protected Health Information filter (Philter): accurately and securely de-identifying free-text clinical notes
Source: PubMed Central journal article supplement (PMC7156708; doi:10.1038/s41746-020-0258-y), 2020-04-14
Supplement: 41746_2020_258_MOESM1_ESM.pdf [file 41746_2020_258_MOESM1_ESM.pdf]

## Supplemental Background

### Motivation

Initially, our plan was to identify a pre-existing de-identification system that we could use for this task. The number of open-source publicly available de-identification software systems is very small. We began the search for such a system by examining the HIPAA-defined, token-based, recall results of the i2b2 2014 de-identification challenge<sup>1</sup>. Unfortunately, the top performing entry, Nottingham system<sup>2</sup>, was specifically fine-tuned for both the i2b2 dataset as well as the i2b2 evaluation script (using a post-processing script to modify tokens to maximize scoring), potentially limiting its generalization and resulting in over-optimistic assessment of performance. Additionally, the Nottingham system is not publicly available for use. Interestingly, the only publicly available de-identification algorithm that was used in the competition, MITRE's MIST tool<sup>3</sup>, fared quite poorly (HIPAA token recall of .805) even when supplemented with the well regarded Stanford NER tagger and pre-trained on an additional private corpus from Kaiser.

A wider literature review of post-i2b2 challenge identified a couple of potentially promising candidates that used Deep Recurrent Neural Networks and reported results on the i2b2 2014 corpus for comparison<sup>4,5</sup>. However, the Lui et al. system is not publicly available in any form, and while the Dernoncourt et al. team have made available a Named Entity Recognition tagger based on their work, the de-identification system reported in their paper is not available.

### Existing De-Identification Corpora

There are a very small number of public corpora that have been labeled for PHI and are available to develop or test de-identification algorithms. The Informatics for Integrating Biology and the Bedside (i2b2) program, released a corpus of 889 discharge summaries as part of a challenge in 2006 to evaluate state-of-the-art systems for automatically targeting and removing PHI<sup>6</sup>. In 2008, PhysioNet released a corpus of 2,434 nursing notes that they used to build a software de-identification tool<sup>7,8</sup>. In 2014, i2b2 released another corpus as part of a new challenge consisting of 1,304 longitudinal clinical narratives derived from 295 hand-selected diabetic patients at risk for coronary artery disease<sup>1,9</sup>.

## Supplemental Methods

### UCSF Corpora

**Supplemental Table 1: PHI Categories**

| PHI Categories                     |
|------------------------------------|
| Age >= 90                          |
| Patient_Vehicle_or_Device_Id       |
| Patient_Account_Number             |
| Patient_Medical_Record_Id          |
| Patient_Social_Security_Number     |
| Patient_Initials                   |
| Patient_Name_or_Family_Member_Name |
| Patient_Address                    |
| Patient_Unique_ID                  |

|                                 |
|---------------------------------|
| Email                           |
| URL_IP                          |
| Date                            |
| Phone_Fax                       |
| Provider_Certificate_or_License |
| Provider_Name                   |
| Provider_Initials               |
| Provider_Address_or_Location    |

Supplemental Table 2: Distribution of 2500 training notes Across Departments

| Department_Specialty                                      | Count      |
|-----------------------------------------------------------|------------|
|                                                           |            |
| <b>Gastroenterology</b>                                   | <b>233</b> |
| <b>Obstetrics</b>                                         | <b>225</b> |
| <b>Radiology</b>                                          | <b>181</b> |
| <b>General Internal<br/>Medicine</b>                      | <b>177</b> |
| <b>Pulmonology</b>                                        | <b>161</b> |
| <b>Pulmonary Function<br/>and Bronchoscopy</b>            | <b>133</b> |
| <b>Ophthalmology</b>                                      | <b>128</b> |
| <b>Obstetrics and<br/>Gynecology</b>                      | <b>121</b> |
| <b>Emergency Medicine</b>                                 | <b>117</b> |
| <b>Family Medicine</b>                                    | <b>103</b> |
| <b>Dermatology</b>                                        | <b>82</b>  |
| <b>Cardiology</b>                                         | <b>75</b>  |
| <b>Reproductive<br/>Endocrinology and<br/>Infertility</b> | <b>60</b>  |
| <b>Kidney<br/>Transplantation</b>                         | <b>54</b>  |
| <b>Endocrinology and<br/>Metabolism</b>                   | <b>51</b>  |
| <b>Urologic Oncology</b>                                  | <b>50</b>  |
| <b>Hepatology</b>                                         | <b>48</b>  |
| <b>Primary Care</b>                                       | <b>46</b>  |
| <b>General Pediatrics</b>                                 | <b>43</b>  |
| <b>Neurology</b>                                          | <b>40</b>  |
| <b>Orthopedic Surgery</b>                                 | <b>39</b>  |
| <b>Liver Transplant</b>                                   | <b>38</b>  |
| <b>Neurosurgery</b>                                       | <b>38</b>  |
| <b>Anesthesiology</b>                                     | <b>35</b>  |

|                                              |           |
|----------------------------------------------|-----------|
| <b>Pediatric Gastroenterology</b>            | <b>35</b> |
| <b>Otolaryngology, Head and Neck Surgery</b> | <b>33</b> |
| <b>Radiology MR</b>                          | <b>30</b> |
| <b>Rheumatology</b>                          | <b>27</b> |
| <b>Radiology CT</b>                          | <b>26</b> |
| <b>Hematology and Oncology</b>               | <b>25</b> |
| <b>Urology</b>                               | <b>25</b> |
| <b>Lung Transplant</b>                       | <b>20</b> |
| <b>Breast Care - Cancer Center</b>           | <b>19</b> |
| <b>Pediatric Nephrology</b>                  | <b>19</b> |
| <b>Psychiatry</b>                            | <b>19</b> |
| <b>Allergy and Immunology</b>                | <b>15</b> |
| <b>Interventional Radiology</b>              | <b>15</b> |
| <b>Pediatric Cardiology</b>                  | <b>15</b> |
| <b>Geriatric Medicine</b>                    | <b>13</b> |
| <b>Lab</b>                                   | <b>13</b> |
| <b>Nephrology</b>                            | <b>13</b> |
| <b>Pediatric Endocrinology</b>               | <b>13</b> |
| <b>Pediatric Neurology</b>                   | <b>13</b> |
| <b>Gastrointestinal Oncology</b>             | <b>12</b> |
| <b>Physical Therapy</b>                      | <b>12</b> |
| <b>Dysplasia</b>                             | <b>11</b> |
| <b>HIV Program</b>                           | <b>10</b> |
| <b>Infusion and Transfusion</b>              | <b>10</b> |
| <b>Pediatric Oncology</b>                    | <b>10</b> |
| <b>Pediatric Rheumatology</b>                | <b>10</b> |
| <b>Gynecologic Oncology</b>                  | <b>9</b>  |
| <b>Prenatal Diagnosis</b>                    | <b>9</b>  |
| <b>Pain Medicine</b>                         | <b>8</b>  |
| <b>Radiation Oncology</b>                    | <b>8</b>  |
| <b>Anticoagulation</b>                       | <b>6</b>  |
| <b>Heart Transplant</b>                      | <b>6</b>  |
| <b>Nuclear Medicine</b>                      | <b>6</b>  |

|                                                        |          |
|--------------------------------------------------------|----------|
| <b>Pathology</b>                                       | <b>6</b> |
| <b>Adolescent Medicine</b>                             | <b>5</b> |
| <b>Employee Health Services</b>                        | <b>5</b> |
| <b>Pediatric Hematology</b>                            | <b>5</b> |
| <b>Pediatric Otolaryngology, Head and Neck Surgery</b> | <b>5</b> |
| <b>Thoracic Oncology</b>                               | <b>5</b> |
| <b>General Surgery</b>                                 | <b>4</b> |
| <b>Genetics - Cancer Center</b>                        | <b>4</b> |
| <b>Investigational Therapy</b>                         | <b>4</b> |
| <b>Optometry</b>                                       | <b>4</b> |
| <b>Pediatric Pulmonology</b>                           | <b>4</b> |
| <b>Plastic Surgery</b>                                 | <b>4</b> |
| <b>Executive Health</b>                                | <b>3</b> |
| <b>Home Health Services</b>                            | <b>3</b> |
| <b>Orthotics</b>                                       | <b>3</b> |
| <b>Pediatric Immunology</b>                            | <b>3</b> |
| <b>Pediatric Urology</b>                               | <b>3</b> |
| <b>Sleep Medicine</b>                                  | <b>3</b> |
| <b>Audiology</b>                                       | <b>2</b> |
| <b>Colorectal Surgery</b>                              | <b>2</b> |
| <b>Endocrine Surgery</b>                               | <b>2</b> |
| <b>Orthopedic Surgical Oncology</b>                    | <b>2</b> |
| <b>Pediatric Anesthesiology</b>                        | <b>2</b> |
| <b>Pediatric Orthopedic Surgery</b>                    | <b>2</b> |
| <b>Pediatric Physical Medicine and Rehabilitation</b>  | <b>2</b> |
| <b>Pediatric Surgery</b>                               | <b>2</b> |
| <b>Respiratory Therapy</b>                             | <b>2</b> |
| <b>STOR Immunizations Converted</b>                    | <b>2</b> |
| <b>Surgical Oncology</b>                               | <b>2</b> |
| <b>Thoracic Surgery</b>                                | <b>2</b> |

|                                           |          |
|-------------------------------------------|----------|
| <b>Vascular Lab</b>                       | <b>2</b> |
| <b>Cardiothoracic Surgery</b>             | <b>1</b> |
| <b>Clinical Research</b>                  | <b>1</b> |
| <b>Craniofacial Anomalies</b>             | <b>1</b> |
| <b>Diabetes Services</b>                  | <b>1</b> |
| <b>Hospice and Palliative Medicine</b>    | <b>1</b> |
| <b>Hospital Medicine</b>                  | <b>1</b> |
| <b>Infectious Diseases</b>                | <b>1</b> |
| <b>Interpreting Services</b>              | <b>1</b> |
| <b>Melanoma</b>                           | <b>1</b> |
| <b>Pediatric Bone Marrow Transplant</b>   | <b>1</b> |
| <b>Pediatric Infectious Disease</b>       | <b>1</b> |
| <b>Pediatric Infusion and Transfusion</b> | <b>1</b> |
| <b>Pediatric Occupational Therapy</b>     | <b>1</b> |
| <b>Pediatric Pulmonary Function</b>       | <b>1</b> |
| <b>Social Services</b>                    | <b>1</b> |
| <b>Support Service - Cancer Center</b>    | <b>1</b> |
| <b>Vascular Surgery</b>                   | <b>1</b> |

Supplemental Table 2: Department Specialties are uniquely coded by UCSF and retrieved as meta-data from the notes. Many notes do not contain this specific meta-data field. Only non-null values for department\_specialty are reported here.

**Supplemental Table 3: Distribution of Testing Notes Across Departments**

| <b>Department_Specialty</b> | <b>Count</b> |
|-----------------------------|--------------|
|                             |              |

|                                                           |           |
|-----------------------------------------------------------|-----------|
| <b>Obstetrics</b>                                         | <b>95</b> |
| <b>Radiology</b>                                          | <b>73</b> |
| <b>Pulmonology</b>                                        | <b>71</b> |
| <b>General Internal<br/>Medicine</b>                      | <b>70</b> |
| <b>Gastroenterology</b>                                   | <b>69</b> |
| <b>Ophthalmology</b>                                      | <b>66</b> |
| <b>Pulmonary Function<br/>and Bronchoscopy</b>            | <b>64</b> |
| <b>Emergency Medicine</b>                                 | <b>60</b> |
| <b>Endocrinology and<br/>Metabolism</b>                   | <b>51</b> |
| <b>Obstetrics and<br/>Gynecology</b>                      | <b>51</b> |
| <b>Family Medicine</b>                                    | <b>50</b> |
| <b>Kidney<br/>Transplantation</b>                         | <b>38</b> |
| <b>Cardiology</b>                                         | <b>34</b> |
| <b>Dermatology</b>                                        | <b>30</b> |
| <b>Hepatology</b>                                         | <b>27</b> |
| <b>Primary Care</b>                                       | <b>26</b> |
| <b>Reproductive<br/>Endocrinology and<br/>Infertility</b> | <b>26</b> |
| <b>General Pediatrics</b>                                 | <b>22</b> |
| <b>Liver Transplant</b>                                   | <b>20</b> |
| <b>Neurosurgery</b>                                       | <b>19</b> |
| <b>Pediatric<br/>Gastroenterology</b>                     | <b>19</b> |
| <b>Urologic Oncology</b>                                  | <b>18</b> |
| <b>Hematology and<br/>Oncology</b>                        | <b>17</b> |
| <b>Neurology</b>                                          | <b>17</b> |
| <b>Orthopedic Surgery</b>                                 | <b>17</b> |
| <b>Radiology CT</b>                                       | <b>15</b> |
| <b>Otolaryngology,<br/>Head and Neck<br/>Surgery</b>      | <b>13</b> |
| <b>Radiology MR</b>                                       | <b>13</b> |
| <b>Urology</b>                                            | <b>13</b> |
| <b>Rheumatology</b>                                       | <b>12</b> |
| <b>Anesthesiology</b>                                     | <b>11</b> |
| <b>Gastrointestinal<br/>Oncology</b>                      | <b>10</b> |
| <b>Interventional</b>                                     | <b>10</b> |

|                                       |          |
|---------------------------------------|----------|
| <b>Radiology</b>                      |          |
| <b>Breast Care - Cancer Center</b>    | <b>9</b> |
| <b>Lung Transplant</b>                | <b>9</b> |
| <b>Nephrology</b>                     | <b>8</b> |
| <b>Pediatric Endocrinology</b>        | <b>8</b> |
| <b>Geriatric Medicine</b>             | <b>7</b> |
| <b>Lab</b>                            | <b>5</b> |
| <b>Pediatric Nephrology</b>           | <b>5</b> |
| <b>Anticoagulation</b>                | <b>4</b> |
| <b>Dysplasia</b>                      | <b>4</b> |
| <b>Executive Health</b>               | <b>4</b> |
| <b>Pediatric Cardiology</b>           | <b>4</b> |
| <b>Pediatric Rheumatology</b>         | <b>4</b> |
| <b>Psychiatry</b>                     | <b>4</b> |
| <b>Radiation Oncology</b>             | <b>4</b> |
| <b>General Surgery</b>                | <b>3</b> |
| <b>Interpreting Services</b>          | <b>3</b> |
| <b>Investigational Therapy</b>        | <b>3</b> |
| <b>Neuro-Interventional Radiology</b> | <b>3</b> |
| <b>Pathology</b>                      | <b>3</b> |
| <b>Pediatric Neurology</b>            | <b>3</b> |
| <b>Respiratory Therapy</b>            | <b>3</b> |
| <b>Thoracic Oncology</b>              | <b>3</b> |
| <b>Adolescent Medicine</b>            | <b>2</b> |
| <b>Allergy and Immunology</b>         | <b>2</b> |
| <b>Employee Health Services</b>       | <b>2</b> |
| <b>Gynecologic Oncology</b>           | <b>2</b> |
| <b>Heart Transplant</b>               | <b>2</b> |
| <b>HIV Program</b>                    | <b>2</b> |
| <b>Infusion and Transfusion</b>       | <b>2</b> |
| <b>Orthopedic Surgical Oncology</b>   | <b>2</b> |
| <b>Pediatric Pulmonology</b>          | <b>2</b> |
| <b>Prenatal Diagnosis</b>             | <b>2</b> |
| <b>Surgical Oncology</b>              | <b>2</b> |

|                                     |          |
|-------------------------------------|----------|
| <b>Audiology</b>                    | <b>1</b> |
| <b>Endocrine Surgery</b>            | <b>1</b> |
| <b>Endocrinology</b>                | <b>1</b> |
| <b>Hospital Medicine</b>            | <b>1</b> |
| <b>Integrative Medicine</b>         | <b>1</b> |
| <b>Melanoma</b>                     | <b>1</b> |
| <b>Nuclear Medicine</b>             | <b>1</b> |
| <b>Optometry</b>                    | <b>1</b> |
| <b>Pain Medicine</b>                | <b>1</b> |
| <b>Pediatric Diabetes</b>           | <b>1</b> |
| <b>Pediatric Hematology</b>         | <b>1</b> |
| <b>Pediatric Oncology</b>           | <b>1</b> |
| <b>Pediatric Orthopedic Surgery</b> | <b>1</b> |
| <b>Physical Therapy</b>             | <b>1</b> |
| <b>Plastic Surgery</b>              | <b>1</b> |
| <b>Sleep Medicine</b>               | <b>1</b> |
| <b>Social Services</b>              | <b>1</b> |
| <b>Symptom Management</b>           | <b>1</b> |

Supplemental Table 3: Department Specialties are uniquely coded by UCSF and retrieved as meta-data from the notes. Many notes do not contain this specific meta-data field. Only non-null values for department\_specialty are reported here.

### Sensitivity Analysis

In addition to Recall, F2 performance, and our primary sensitivity analysis, we were interested in two additional sensitivity analysis. First, we were interested in determining the impact of partial de-identification successes, specifically, were there instances where only a portion of the PHI was removed that made the changed remaining associated tokens from PHI to safe. An example would be obscuring part of a date (eg: 1/1/2018 → \*/\*/2018) or most of a name (eg: John A Smith → \*\*\*\* A \*\*\*\*\*). Second, while not emphasizing Precision as a de-identification metric, we wanted to catalog which elements of the Philter pipeline were the greatest contributors to precision errors to better anticipate which types of non-PHI words were most likely to be erroneously removed.

### Supplemental Results

Supplemental Sensitivity Analysis One: What PHI Actually Remains after de-identification  
 Even when de-identification failed to completely remove an entire PHI entity, approximately 20% of the time it removed enough of the entity to make it no longer recognizable as PHI

Supplemental Sensitivity Analysis Two: Precision Errors

The portions of the pipeline that search for names were the most significant contributors to precision errors.

### Supplemental Table 4. Recognizable PHI Analysis (PHilter, UCSF Test Corpus)

| PHI Category | Recognizable PHI |
|--------------|------------------|
|--------------|------------------|



|                                    |    |
|------------------------------------|----|
| Age >= 90                          | 0  |
| Patient_Vehicle_or_Device_Id       | 0  |
| Patient_Account_Number             | 0  |
| Patient_Medical_Record_Id          | 0  |
| Patient_Social_Security_Number     | 0  |
| Patient_Phone_Fax                  | 0  |
| Patient_Initials                   | 0  |
| Patient_Name_or_Family_Member_Name | 6  |
| Patient_Address                    | 4  |
| Patient_Unique_ID                  | 11 |
| Email                              | 0  |
| URL_IP                             | 0  |
| Date                               | 6  |
| Provider_Certificate_or_License    | 0  |
| Provider_Name                      | 11 |
| Provider_Initials                  | 6  |
| Provider_Address_or_Location       | 40 |
| Provider_Phone_Fax                 | 45 |

Supplemental Table 4. Recognizable PHI counts for PHilter performance on the UCSF corpus. We defined “recognizable PHI” as any annotated identifier that was not PHI according to HIPAA after surrounding PHI was removed. There were 158 total FNs for Philter on the UCSF corpus initially, with 129 recognizable as PHI by human analysis after de-identification. Refer to the “Not Recognizable PHI” column in Supplemental Table 3 for detailed information on criteria used for determining recognizable PHI.

**Supplemental Table 5. Recognizable PHI Analysis (PHilter, I2B2 Corpus)**

| PHI Category   | Recognizable PHI |
|----------------|------------------|
| AGE            | 0                |
| DEVICE         | 0                |
| MEDICALRECORD  | 0                |
| PATIENT        | 2                |
| DATE           | 0                |
| FAX            | 0                |
| PHONE          | 0                |
| ZIP            | 0                |
| USERNAME       | 0                |
| STREET         | 2                |
| LOCATION-OTHER | 2                |
| IDNUM          | 0                |
| CITY           | 2                |

|               |   |
|---------------|---|
| <b>DOCTOR</b> | 4 |
|---------------|---|

Supplemental Table 5. Recognizable PHI counts for PHilter performance on the i2b2 test corpus. There were 16 total FNs for Philter on the UCSF corpus initially, with 12 recognizable as PHI by human analysis after de-identification.

**Supplemental Table 6. False Positive Count by PHilter Configuration File Element on the UCSF corpus**

| <b>Filter</b>                                           | <b>False Positive Count</b> |
|---------------------------------------------------------|-----------------------------|
| Last Names Blacklist (lastnames_minus_fps.json)         | 1830                        |
| Whitelist                                               | 1725                        |
| First Names Blacklist (firstnames_minus_fps.json)       | 1236                        |
| 'filters/regex_context/names_regex_context3.txt'        | 649                         |
| 'filters/regex_context/initials.txt'                    | 508                         |
| 'filters/regex/dates/mm_yy_transformed.txt'             | 366                         |
| 'filters/regex/addresses/hospital2.txt'                 | 356                         |
| 'filters/regex/dates/mm_dd_transformed.txt'             | 301                         |
| 'filters/regex_context/names_regex_context2.txt'        | 252                         |
| 'filters/regex/addresses/in_city_transformed.txt'       | 242                         |
| 'filters/regex/ucsf_regex/ucsf_neighborhoods.txt'       | 226                         |
| 'filters/regex/contact/xxx_xxx_xxxx.txt'                | 191                         |
| 'filters/regex/salutations/post_salutations_2chars.txt' | 172                         |
| 'filters/regex/dates/dd_mm_transformed.txt'             | 161                         |
| 'filters/regex/dates/month_name_transformed.txt'        | 108                         |
| 'filters/regex/dates/mm_dd_yy_transformed.txt'          | 102                         |
| 'filters/regex/salutations/pre_salutations_2chars.txt'  | 101                         |

Supplemental Table 6. Each row name corresponds directly a file process within the pipeline and its relative location on the software filepath. False positive (FP) counts for PHilter configuration file elements with FP counts >=100. Because multiple filters matched some FPs, FP counts do not reflect total number of FPs generated by PHilter, but rather the total number of times each filter matched any FP.

**Supplemental Table 7: UCSF corpus**

| <b>PHI Category</b> | <b>TPs</b> | <b>FNs</b> | <b>Recall</b> |
|---------------------|------------|------------|---------------|
| Age >= 90           | 11         | 0          | 100.00%       |

|                                           |       |    |         |
|-------------------------------------------|-------|----|---------|
| <b>Patient_Vehicle_or_Device_Id</b>       | 550   | 0  | 100.00% |
| <b>Patient_Account_Number</b>             | 35    | 0  | 100.00% |
| <b>Patient_Medical_Record_Id</b>          | 471   | 0  | 100.00% |
| <b>Patient_Social_Security_Number</b>     | 30    | 0  | 100.00% |
| <b>Patient_Initials</b>                   | 721   | 2  | 99.72%  |
| <b>Patient_Name_or_Family_Member_Name</b> | 1579  | 6  | 99.62%  |
| <b>Patient_Address</b>                    | 3996  | 7  | 99.83%  |
| <b>Patient_Unique_ID</b>                  | 652   | 20 | 97.02%  |
| <b>Email</b>                              | 120   | 0  | 100.00% |
| <b>URL_IP</b>                             | 468   | 4  | 99.15%  |
| <b>Date</b>                               | 13396 | 7  | 99.95%  |
| <b>Phone_Fax</b>                          | 1469  | 45 | 97.03%  |
| <b>Provider_Certificate_or_License</b>    | 369   | 0  | 100.00% |
| <b>Provider_Name</b>                      | 5045  | 12 | 99.76%  |
| <b>Provider_Initials</b>                  | 721   | 12 | 98.36%  |
| <b>Provider_Address_or_Location</b>       | 3998  | 43 | 98.94%  |

Supplemental Table 7 TP/FN counts and recall per PHI category for PHilter performance on the UCSF test corpus. The following annotated PHI categories were not considered PHI for performance evaluation purposes, and not included in performance analysis:.

**Supplemental Table 8. Overall Recall Per PHI Category (PHIIter, I2B2 Test Corpus)**

| PHI Category   | TPs   | FNs | Recall  |
|----------------|-------|-----|---------|
| AGE            | 7     | 0   | 100.00% |
| DEVICE         | 12    | 0   | 100.00% |
| MEDICALRECORD  | 721   | 0   | 100.00% |
| PATIENT        | 1445  | 2   | 99.86%  |
| DATE           | 11880 | 0   | 100.00% |
| FAX            | 6     | 0   | 100.00% |
| PHONE          | 407   | 0   | 100.00% |
| ZIP            | 143   | 0   | 100.00% |
| USERNAME       | 91    | 1   | 98.91%  |
| STREET         | 414   | 2   | 99.52%  |
| LOCATION-OTHER | 12    | 2   | 85.71%  |
| IDNUM          | 377   | 2   | 99.47%  |
| CITY           | 338   | 2   | 99.41%  |
| DOCTOR         | 3231  | 5   | 99.85%  |

[Supplemental References](#)

- 1 Stubbs, A., Kotfila, C. & Uzuner, O. Automated systems for the de-identification of longitudinal clinical narratives: Overview of 2014 i2b2/UTHealth shared task Track 1. *J Biomed Inform* **58 Suppl**, S11-19, doi:10.1016/j.jbi.2015.06.007 (2015).
- 2 Yang, H. & Garibaldi, J. M. Automatic detection of protected health information from clinic narratives. *J Biomed Inform* **58 Suppl**, S30-38, doi:10.1016/j.jbi.2015.06.015 (2015).
- 3 Aberdeen, J. *et al.* The MITRE Identification Scrubber Toolkit: design, training, and assessment. *Int J Med Inform* **79**, 849-859, doi:10.1016/j.ijmedinf.2010.09.007 (2010).
- 4 Dernoncourt, F., Lee, J. Y., Uzuner, O. & Szolovits, P. De-identification of patient notes with recurrent neural networks. *J Am Med Inform Assoc* **24**, 596-606, doi:10.1093/jamia/ocw156 (2017).
- 5 Liu, Z., Tang, B., Wang, X. & Chen, Q. De-identification of clinical notes via recurrent neural network and conditional random field. *J Biomed Inform* **75S**, S34-S42, doi:10.1016/j.jbi.2017.05.023 (2017).
- 6 Uzuner, O., Luo, Y. & Szolovits, P. Evaluating the state-of-the-art in automatic de-identification. *J Am Med Inform Assoc* **14**, 550-563, doi:10.1197/jamia.M2444 (2007).
- 7 Goldberger, A. L. *et al.* PhysioBank, PhysioToolkit, and PhysioNet: components of a new research resource for complex physiologic signals. *Circulation* **101**, E215-220 (2000).
- 8 Neamatullah, I. *et al.* Automated de-identification of free-text medical records. *BMC Med Inform Decis Mak* **8**, 32, doi:10.1186/1472-6947-8-32 (2008).
- 9 Stubbs, A. & Uzuner, O. Annotating longitudinal clinical narratives for de-identification: The 2014 i2b2/UTHealth corpus. *J Biomed Inform* **58 Suppl**, S20-29, doi:10.1016/j.jbi.2015.07.020 (2015).
